# Supplementary material for: Photon-initiated heterogeneous redox couples for methylation of anilines under mild conditions
Source: Royal Society of Chemistry journal article supplement (doi:10.1039/d0gc01385d), 2020-01-01
Supplement: d0gc01385d1.pdf [file d0gc01385d1.pdf]

## Electronic Supplementary Information (ESI)

### Photon-initiated heterogeneous redox couples for Methylation of Anilines under mild conditions

Bing Zhang<sup>a\*</sup>, Hua Gao<sup>b</sup>, Wei Wang<sup>b\*</sup>

[a] Dr. B. Zhang,

*International Collaborative Laboratory of 2D Materials for Optoelectronics Science and Technology of Ministry of Education, Institute of Microscale Optoelectronics, Shenzhen University, Shenzhen 518060, P. R. China*

*Email: [chemzhang218@126.com](mailto:chemzhang218@126.com)*

[b] Mr. H. Gao, Dr. W. Wang,

*School of Materials Science and Engineering, Ocean University of China, 238 Songling Road, Qingdao 266100, China*

*Email: [clwang@ouc.edu.cn](mailto:clwang@ouc.edu.cn)*

**Abstract:** Methylation of anilines deserves lots of attention due to their valuable applications and directly using methanol as methylation reagent is of great advantages. Photon-initiated heterogeneous catalysis of this methylation process meets the requirements of green chemistry. Herein we show that balanced redox zones within carbon nitride supported Pd nanoparticles boost the selectivity of methylation of anilines under mild conditions.

## Experimental Procedures

### 1. Materials

Cyanamide (Stru Chem Co., 95%), aniline (Adamas-beta Reagent Co., Ltd, 99%), Methanol (HPLC, Adamas-beta Reagent Co., Ltd, 99.9%), triethanolamine (TEOA, Aladdin, 98%), butyl alcohol (Aladdin, 99%), benzyl alcohol (Aladdin, 99%), PdCl<sub>2</sub> (Aladdin) and ethanol (Adamas Reagent Co., Ltd, 99.8%) were used as received.

### 2. Methods

#### 2.1 Preparation of mesoporous-carbon nitride (mpCN).

mpCN samples were prepared according to previous report<sup>15</sup>. Namely, 5 g of cyanamide was dissolved in 7.5 g of Ludox HS40 solution (dispersion of 12 nm SiO<sub>2</sub> particles with 40 wt% in water) and heated at 65 °C overnight to remove water. The as-obtained white powder was heated at 600 °C for 4 h (ramp: 2.3 °C min<sup>-1</sup>) under the N<sub>2</sub> atmosphere. The resulting brown-yellow powder was treated with 4 M HF acid for 24 h to remove the silica template. The powders were then centrifuged and washed three times with distilled water and twice with ethanol. Finally the powders were dried at 60 °C under vacuum overnight.

#### 2.2 Preparation of bulk carbon nitride.

Bulk CN was prepared by directly calcinating cyanamide powder to 550 °C in N<sub>2</sub> atmosphere. After naturally cooled to room temperature, the as-obtained samples were used for further study and characterizations.

### 3. Photochemical methylation of anilines

The photocatalytic activities of as-obtained photocatalysts for selective methylation of various anilines was performed as follows. A mixture of 20 mg of catalyst and anilines (0.2 mmol) was dissolved in methanol (5 mL), which was saturated with hydrogen gas via a balloon. Then the suspensions were irradiated under a 300 W Xe lamp (PLS-SXE 300, Beijing Perfectlight Co. Ltd). The products were analyzed with an Shimadzu GC-MS System (QP2010 SE)

### 4. Characterizations

The SEM measurements were performed on a FEI Nova NanoSEM 2300. The TEM and HRTEM measurements were taken with a JEM-2100F microscope operated at an acceleration voltage of 200 kV. The Powder X-ray diffraction (XRD) patterns were recorded on a Bruker D8 Advance X-ray diffractometer with Cu-K $\alpha$  radiation ( $\lambda = 1.5418 \text{ \AA}$ ) with a scan rate of 6° min<sup>-1</sup>. The XPS measurements were conducted on a Kratos Axis Ultra DLD spectrometer using a monochromated Al K $\alpha$  radiation. Nitrogen sorption experiments (BET) were performed with a Quadrasorb at 77 K, and data analysis was performed with Quantachrome software. Samples were degassed at 250 °C for 12 h before measurements. The high-performance mass spectrometry was conducted by a Q Exactive GC Orbitrap GC-MS/MS (Thermo Scientific). The inductive coupled plasma emission (ICP) results were conducted on ICP-AES iCAP6300 spectrometer (Thermo).

## Results and Discussion

**Table S1. Comparison of conditions for N-methylation using different methylation reagents.**

| Catalyst                               | Methylation reagent | T (°C)    | P (bar)  | Base                            | Additives                    | Ref              |
|----------------------------------------|---------------------|-----------|----------|---------------------------------|------------------------------|------------------|
| Al <sub>2</sub> (BDC) <sub>3</sub>     | DMC                 | 170       |          | -                               | -                            | S1               |
| Ru(acac) <sub>3</sub>                  | DMC                 | 150       | 60       | -                               | HNTf <sub>2</sub><br>Triphos | S2               |
| CuAlO <sub>x</sub>                     | CO <sub>2</sub>     | 160       | 60       | -                               | hexane                       | S3               |
| Ru(COD)(methylalyl) <sub>2</sub>       | HCOOH               | 150       |          | -                               | MSA<br>triphos               | S4               |
| Fe <sub>2</sub> O <sub>3</sub> / NGr@C | Paraformaldehyde    | 130       |          | Na <sub>2</sub> CO <sub>3</sub> | -                            | S5               |
| Pd(OAc) <sub>2</sub>                   | MeOH                | 80-110    |          | KOH                             | Ligand                       | 4                |
| Mn PNP-pincer complex                  | MeOH                | 100       |          | t-BuOK                          | -                            | 7                |
| Mn pincer-complex                      | MeOH                | 120       |          | t-BuOK                          | -                            | 8                |
| Cp*Ir Complex                          | MeOH                | 120       |          | Cs <sub>2</sub> CO <sub>3</sub> | -                            | 9                |
| <b>Pd@CN</b>                           | <b>MeOH</b>         | <b>55</b> | <b>1</b> | <b>Basic support</b>            | -                            | <b>This work</b> |

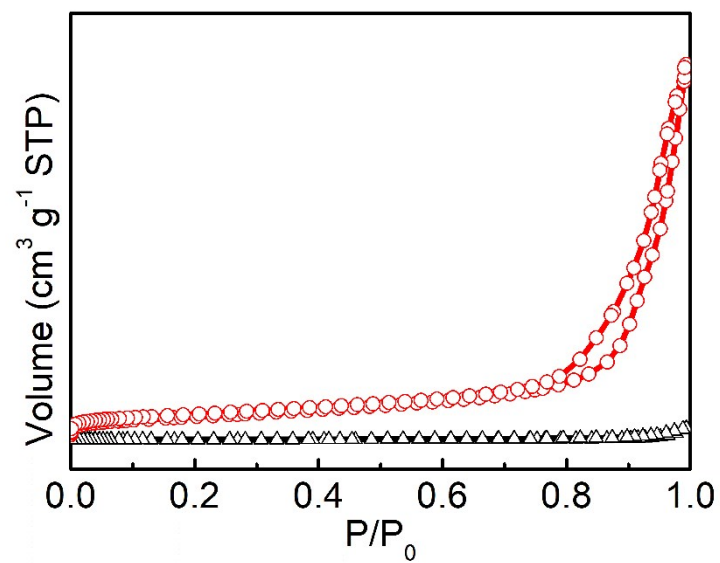

**Figure S1. Nitrogen adsorption/desorption isotherms of mpCN (red) and bulk CN (black).** The introduction of mesopores largely enhanced the surface area for mpCN sample.

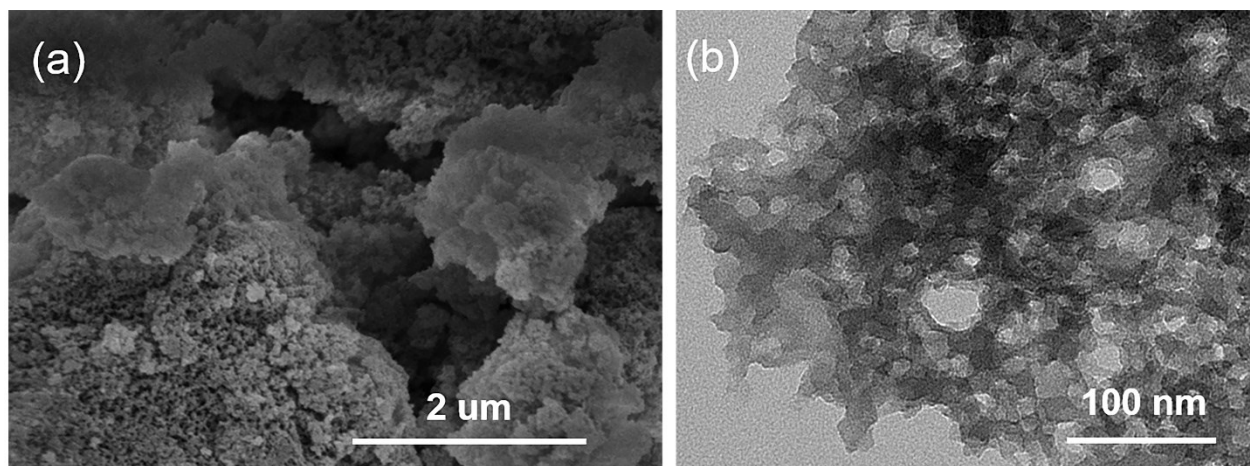

**Figure S2. Large scale SEM image (a) and TEM image of the mpCN. Porous structure can be clearly seen.**

**Table S2. Photocatalytic activities for selective methylation of anilines at mild condition over different metal nanoparticles loaded CN and control samples.**

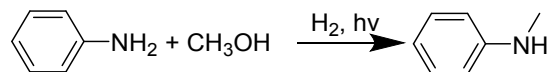

| Entry | Catalyst     | <i>t</i> (h) | Conversion [%] | Selectivity[%] |
|-------|--------------|--------------|----------------|----------------|
| 1     | Ru-3@CN      | 4            | 4.4            | 0              |
| 2     | Pt-3@CN      | 4            | 3.86           | 4              |
| 3     | Au-3@CN      | 4            | 11.1           | 30             |
| 4     | Pd-3@CN      | 4            | 8.3            | 97             |
| 5     | Pd-3@CN      | 8            | 15.2           | 97             |
| 6     | -            | 4            | -              | -              |
| 7*    | Pd-3@CN      | 4            | -              | -              |
| 8     | Pd-3@bulk CN | 4            | 2.6            | 31             |

Typical reaction condition: 20mg catalysts, 5 mL CH<sub>3</sub>OH, 0.2 mmol anilines under visible light irradiation for 4 h; \*means no light irradiation.

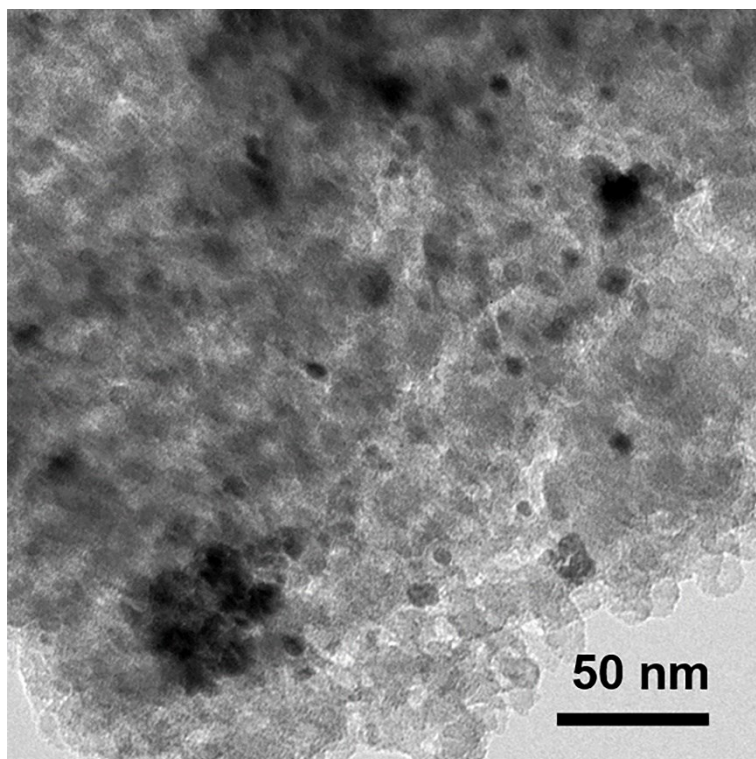

**Figure S3. TEM images of the Pd-18@CN sample.** Large loading amount of Pd nanoparticles may lead to severe aggregation.

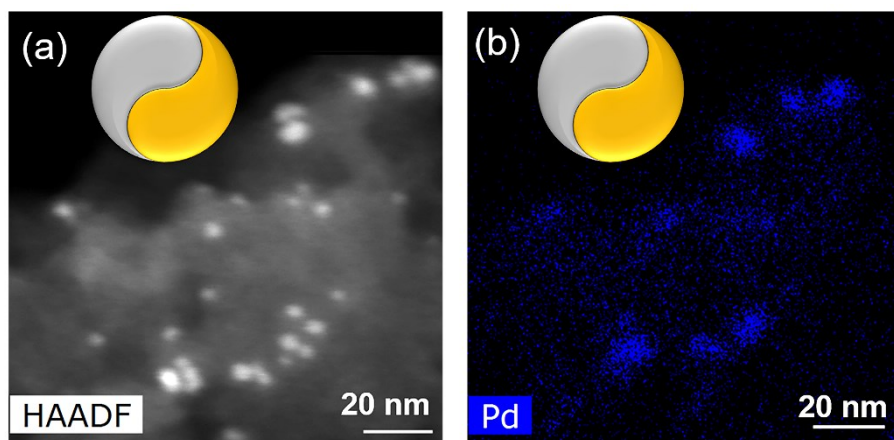

**Figure S4. HAADF-STEM image (a) and corresponding Pd element mapping image (b) of the Pd-3@CN samples.** The Pd nanoparticles well dispersed on the mpCN support.



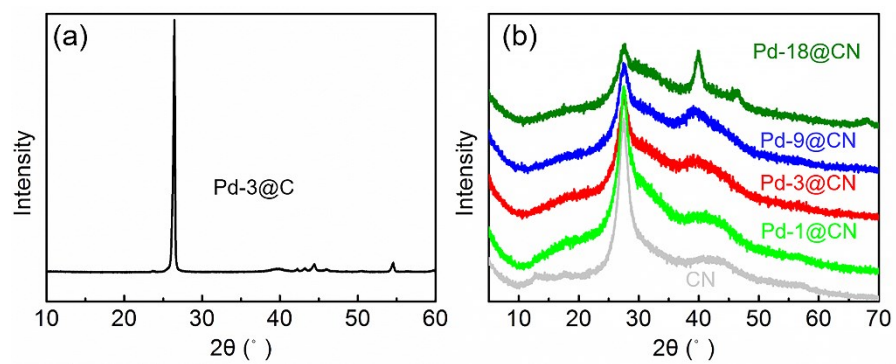

**Figure S5. XRD patterns of Pd-3@CN and control samples.**

**Table S3. Pd contents of typical catalysts detected by ICP.**

| Entry | Catalyst | Contents [wt. %] |
|-------|----------|------------------|
| 1     | Pd-3@CN  | 2.44             |
| 2     | Pd-18@CN | 12.26            |
| 3     | Pd-3@C   | 2.28             |

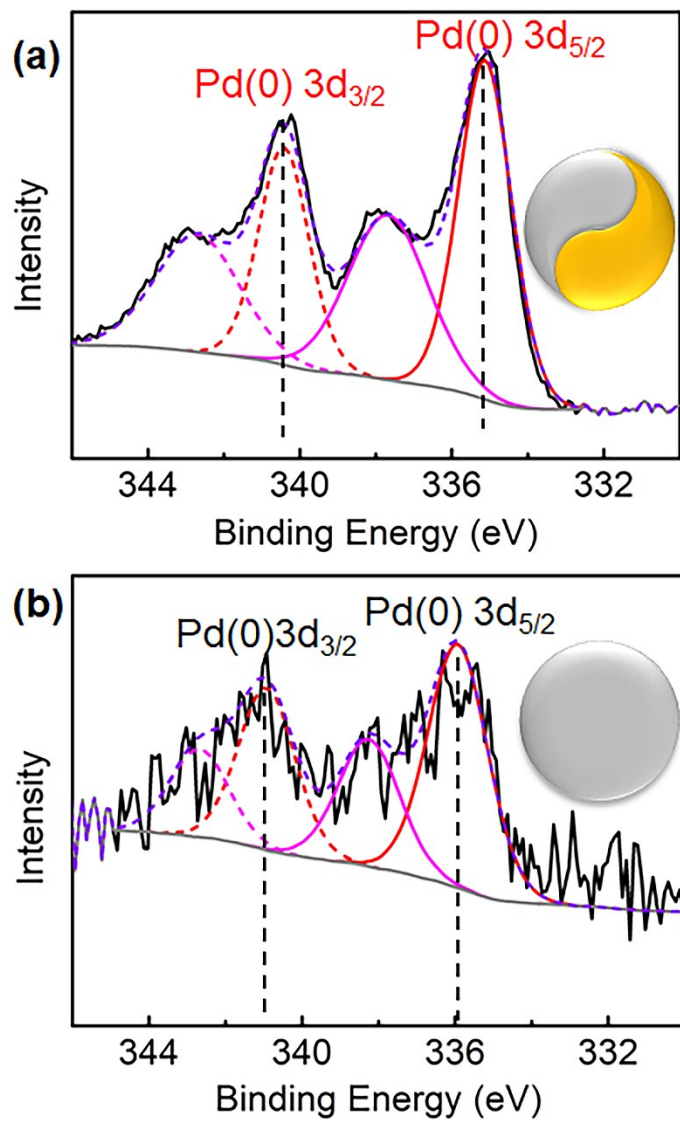

**Figure S6.** XPS Pd 3d spectra of the Pd-3@CN (a) and Pd-3@C (b) samples. The obvious shift to low binding energy illustrated the Mott-Schottky effect over Pd nanoparticles and mpCN support.

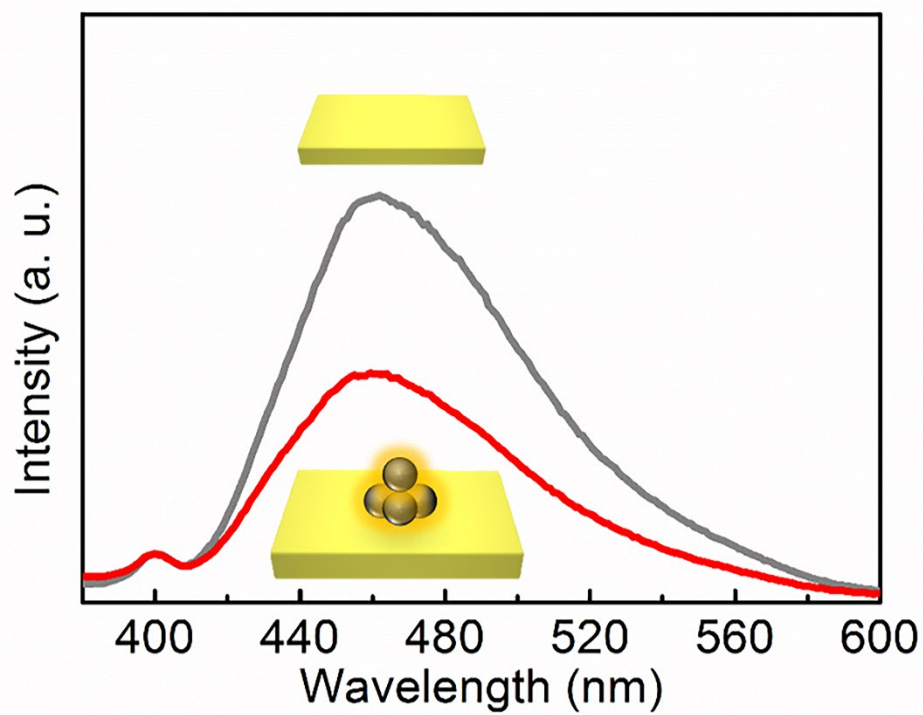

**Figure S7. Photoluminescence spectra of Pd-3@CN and pristine mpCN samples.** The existence of Pd nanoparticles can enhance the separation of photo-induced carriers in mpCN.

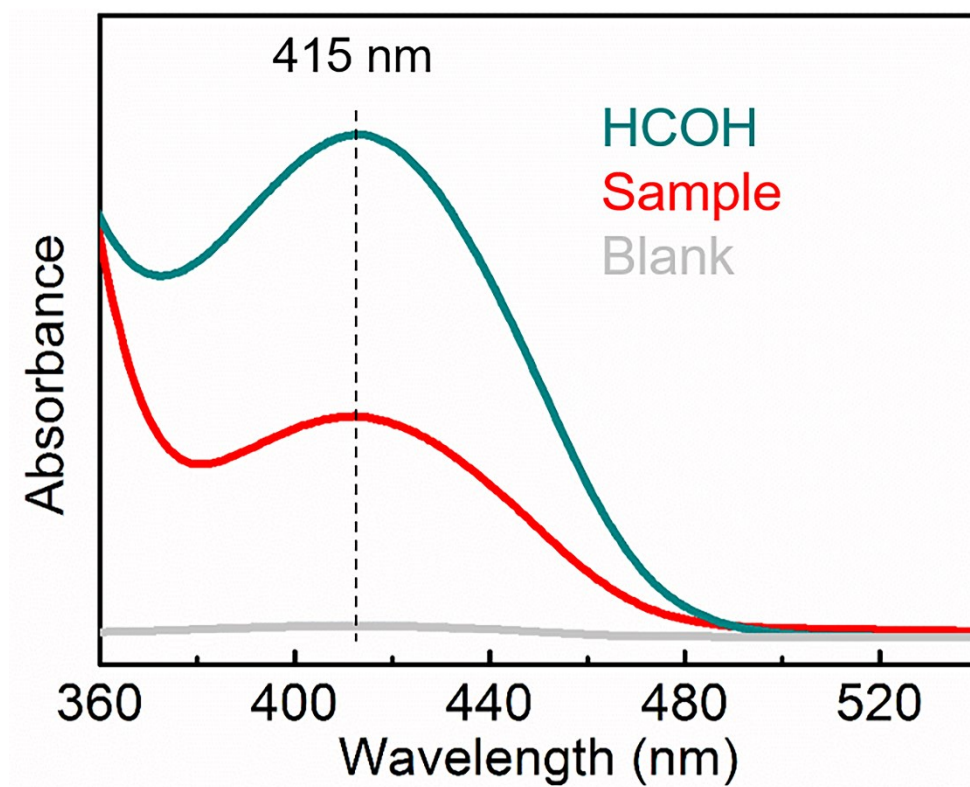

Figure S8. Typical UV-vis spectra for detection of HCHO.

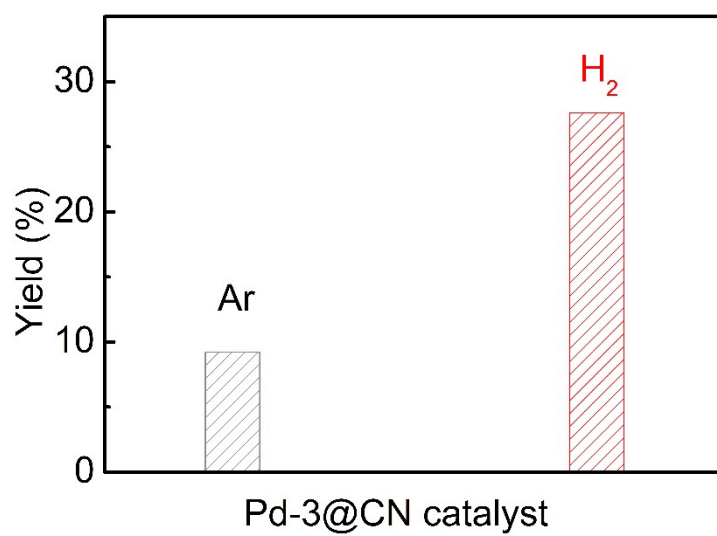

**Figure S9. Photocatalytic activities of Pd-3@CN catalyst for methylation of anilines under Ar or H<sub>2</sub> atmosphere for 4 h.**

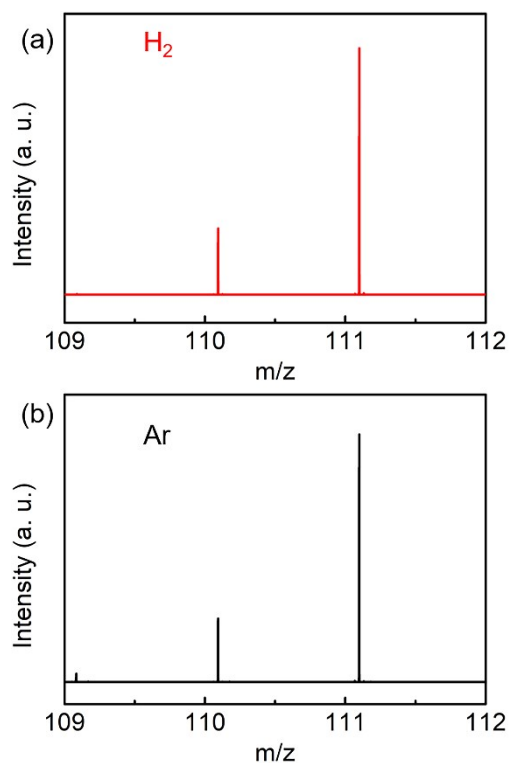

**Figure S10. HRMS analysis of Pd-3@CN photocatalyzed methylation of anilines using CD<sub>3</sub>OD under Ar or H<sub>2</sub> atmosphere.** The peak of 111.0996 represents the molecule of C<sub>7</sub>H<sub>6</sub>D<sub>3</sub>N+1, the peak around 109 doesn't increase under H<sub>2</sub> atmosphere which illustrates the absence of H<sub>2</sub> during the methylation process. While peak near 110 may due to the large amount of CD<sub>3</sub>OD with deuterium incorporation rate of only 99.8%.

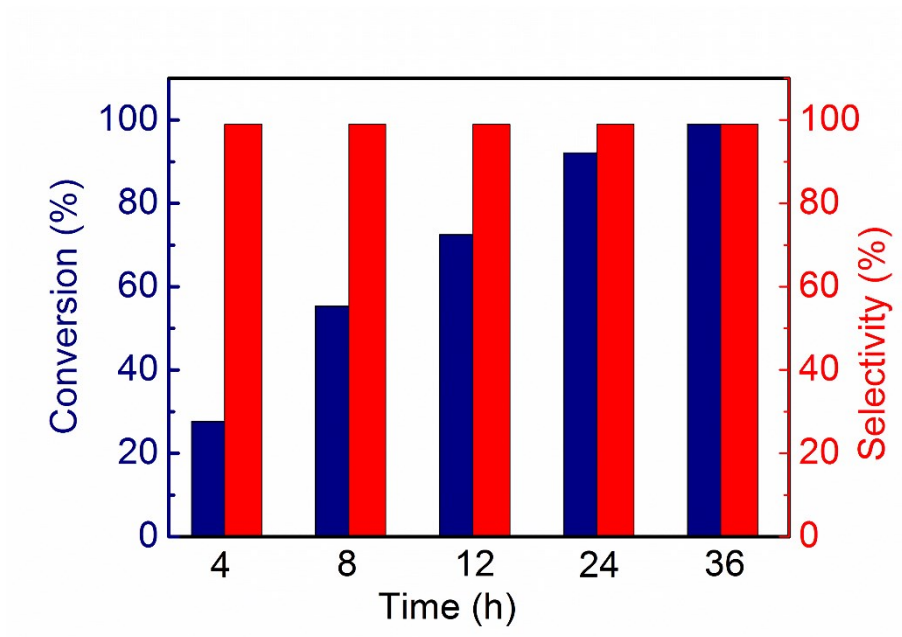

**Figure S11.** The conversion and selectivity efficiency of photo-initiated methylation of anilines over Pd-3@CN for different time under estimated solar irradiation. The conversion exhibited linear increasing tendency and the selectivity kept at 99% as time became longer.



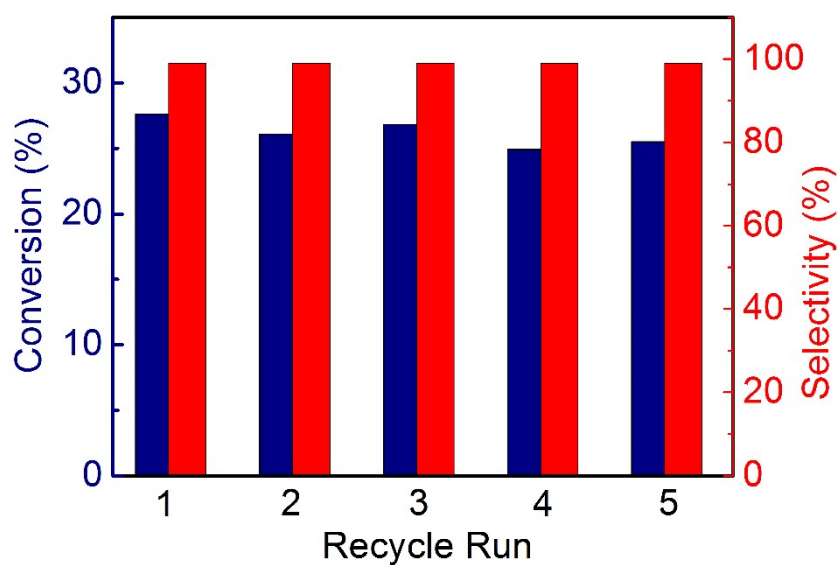

**Figure S12. The reusability of Pd-3@mpCN for photo-initiated methylation of anilines under estimated solar irradiation for 4 h.** The optimized Pd-3@CN showed excellent selectivity and stable conversion efficiency after 4 times.

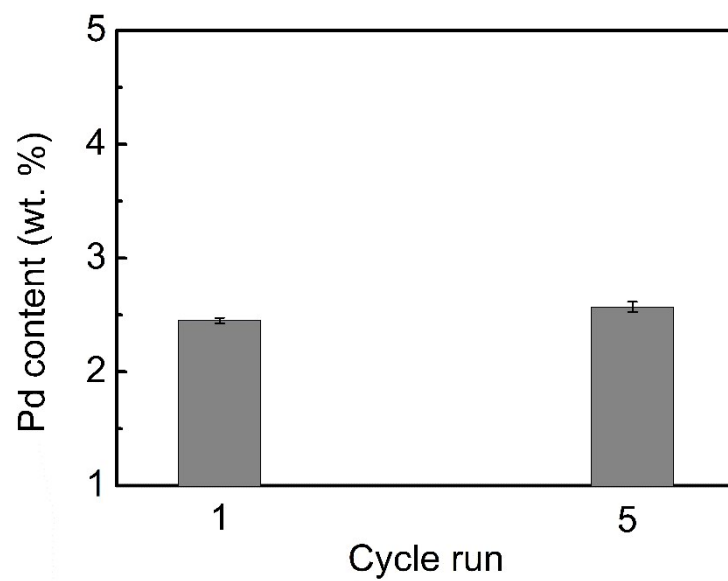

**Figure S13.** ICP results of Pd content within Pd-3@CN catalyst before and after 5 cycles. the palladium content is quite stable after cycles.

## References

- S1. A. Dhakshinamoorthy, M. Alvaro and H. Garcia, *Appl. Catal. A- Gen.* 2010, 378(1): 19-25.
- S2. J. R. Cabrero-Antonino, R. Adam, K. Junge and M. Beller, *Catal. Sci. Technol.* 2016, 6(22): 7956-7966.
- S3. X. Cui, X. Dai, Y. Zhang, Y. Deng and F. Shi, *Chem. Sci.* 2014, 5(2): 649-655.
- S4. S. Savourey, G. Lefèvre, J.-C. Berthet and T. Cantat, *Chem. Commun.* 2014, 50(90): 14033-14036.
- S5. K. Natte, H. Neumann, R. V. Jagadeesh and M. Beller, *Nat. Commun.* 2017, 8(1): 1344.
